# Supplementary material
Source: PubMed Central journal article supplement (PMC6014625)

## SUPPLEMENTARY MATERIAL

**Supplementary Table 1.** Bacterial strains, plasmids and primers used in this study

| <b>Bacterial strains</b>            |                                                                                                                   |                            |                            |               |
|-------------------------------------|-------------------------------------------------------------------------------------------------------------------|----------------------------|----------------------------|---------------|
|                                     | <b>Genotype or characteristics</b>                                                                                | <b>Reference or source</b> |                            |               |
| <i>E. coli</i> TE1                  | $\Delta$ <i>endA</i> derivative of TX1                                                                            | [61]                       | [61]                       |               |
| <i>E. coli</i> ClearColi®           | Lipid IV <sub>A</sub> modification of BL21(DE3)                                                                   | Lucigen, Madison, WI       |                            |               |
| <i>S. aureus</i> Newbould 305       | Bovine clinical isolate                                                                                           | [19]                       |                            |               |
| <b>Plasmids</b>                     |                                                                                                                   |                            |                            |               |
|                                     | <b>Gene</b>                                                                                                       | <b>Vector</b>              | <b>Reference or source</b> |               |
| pLR001                              | <i>isdA</i> (Newbould )                                                                                           | pARLDR19                   | This study                 |               |
| pLR003                              | <i>clfA</i> (Newbould)                                                                                            | pARLDR19                   | This study                 |               |
| pCK001                              | <i>isdA</i> -HIS (Newbould)                                                                                       | pTRCHisA                   | This study                 |               |
| pMAH001                             | <i>clfA</i> -HIS (Newbould)                                                                                       | pBAD18                     | This study                 |               |
| <b>Primers</b>                      |                                                                                                                   |                            |                            |               |
|                                     |                                                                                                                   | <b>Gene</b>                | <b>Amplicon</b>            | <b>Source</b> |
| <b><u>Cloning</u></b>               |                                                                                                                   |                            |                            |               |
| pLR001:                             | <b>FW</b> GCTACTGGCATGCGGCAACAGAAGCTACGAAC<br><b>RV</b> GTGCATGATCGATTTTGGTAATTCTTTAGC                            | <i>isdA</i>                | 846 bp                     | [22]          |
| pLR003:                             | <b>FW</b> GACTGGGCATGCAGGTGTAACTTCAACTGCTAAAG<br><b>RV</b> GCATGGCTCGAGGGAATTGGTTCAATTCACCAG                      | <i>clfA</i>                | 840 bp                     | This study    |
| pCK001:                             | <b>FW</b> GCTACTGGATCCGCGGCAACAGAAGCTACGAAC<br><b>RV</b> GTGCATAAGCTTTCAAGTTTTTGGTAATTCTTTAGC                     | <i>isdA</i>                | 852 bp                     | [22]          |
| pMAH001:                            | <b>FW</b> GATCCTCGCTAGCGGATGGAGTAAGACCATGG<br><b>RV</b> GTACCAGAAGCTTTTAGTGATGGTGATGGT<br>GATGGGGAATTGGTTCAATTTAC | <i>clfA</i>                | 994 bp                     | This study    |
| <b><u>Bovine cytokine qPCR:</u></b> |                                                                                                                   |                            |                            |               |
|                                     | <b>FW</b> GCATCGTGGAGGGACTTATGA<br><b>RV</b> GGGCCATCCACAGTCTTCTG                                                 | GAPDH                      |                            | [62]          |
|                                     | <b>FW</b> CAGCATGGAGCTGCCT<br><b>RV</b> ACAGAACAGGTCTTGCTTGC                                                      | IL-4                       |                            | [63]          |
|                                     | <b>FW</b> CAGAAAGCGGAAGAGAAGTCAGA<br><b>RV</b> TGCAGGCAGGAGGACCAT                                                 | INF- $\gamma$              |                            | [62]          |
|                                     | <b>FW</b> GCCCACCTACTGAGGACAAG<br><b>RV</b> GCTGGATGGTGACAGAGTTC                                                  | IL-17A                     |                            | [64]          |

**Supplementary Table 2.** Temperature and somatic cell count (SCC) from Trials 1 and 2.

|                         | Trial    | Group | Day                 |       |       |       |       |       |       |       |       |       |       |       |
|-------------------------|----------|-------|---------------------|-------|-------|-------|-------|-------|-------|-------|-------|-------|-------|-------|
|                         |          |       | Screen <sup>c</sup> | 1     | 2     | 3     | 14    | 15    | 16    | 49    | 50    | 51    | 60    | 70    |
| <b>Temp<sup>a</sup></b> | <b>1</b> | 1     | -                   | 101.2 | 101.1 | 100.4 | 101.1 | 100.6 | 100.5 | 101.2 | 100.6 | 100.7 | 101.3 | 101.3 |
|                         |          | 2     | -                   | 100.9 | 101.7 | 100.6 | 101.5 | 100.5 | 100.6 | 101.6 | 100.7 | 100.5 | 101.7 | 101.8 |
|                         |          | 3     | -                   | 101.1 | 101.6 | 99.9  | 101.2 | 100.2 | 100.6 | 101.1 | 100.7 | 100.7 | 101.6 | 101.1 |
|                         | <b>2</b> | 1     | -                   | 100.8 | 98.5  | 98.7  | 99.4  | -     | -     | -     | -     | -     | -     | -     |
|                         |          | 2     | -                   | 101.1 | 98.3  | 98.6  | 99.5  | -     | -     | -     | -     | -     | -     | -     |
| <b>SCC<sup>b</sup></b>  | <b>1</b> | 1     | 50                  | -     | -     | -     | -     | -     | -     | -     | -     | -     | 296   | 851   |
|                         |          | 2     | 155                 | -     | -     | -     | -     | -     | -     | -     | -     | -     | 847   | 52    |
|                         |          | 3     | 151                 | -     | -     | -     | -     | -     | -     | -     | -     | -     | 127   | 132   |
|                         | <b>2</b> | 1     | 68                  | -     | -     | -     | -     | -     | -     | -     | -     | -     | 589   | 72    |
|                         |          | 2     | 211                 | -     | -     | -     | -     | -     | -     | -     | -     | -     | 1080  | 69    |

<sup>a</sup> temperature in Fahrenheit by rectal thermometer.

<sup>b</sup> SCC in cells/mL X1000 as determined by California Mastitis Test (CMT)

<sup>c</sup> sample taken on day of screening; -14 for Trial 1 and -9 for Trial 2.

**Supplementary Table 3. Culture and genotyping of *Staphylococcus***

| <i>PCR primers</i> | Sequence                                                                   |                                                                                      | Gene        | Amplicon     | Reference |
|--------------------|----------------------------------------------------------------------------|--------------------------------------------------------------------------------------|-------------|--------------|-----------|
|                    |                                                                            | <i>Staphylococcus</i> : FW GGCCGTGTTGAACGTGGTCAAATCA<br>RV TIACCATTTCAGTACCTTCTGGTAA |             | <i>tstaG</i> | 370 bp    |
|                    | <i>S. aureus</i> : FW GCGATTGATGGTGATACGGTT<br>RV AGCCAAGCCTTGACGAACTAAAGC |                                                                                      | <i>nuc</i>  | 270 bp       | [66]      |
|                    | <i>isdA</i> : FW CGGTTCAACCAAAACCTGCT<br>RV GCGAAGGCAACTGTGCTAAT           |                                                                                      | <i>isdA</i> | 380 bp       | [51]      |
|                    | <i>clfA</i> : FW CCTATGCCAGTAGCCAATGTC<br>RV GCACCAAGCAGGTTATGTC           |                                                                                      | <i>clfA</i> | 318 bp       | [51]      |

  

| <i>Percent Staph positive<sup>a</sup></i> | Trial    | Sample | Group <sup>b</sup> | Day                 |    |    |    |    |    |
|-------------------------------------------|----------|--------|--------------------|---------------------|----|----|----|----|----|
|                                           |          |        |                    | Screen <sup>b</sup> | 1  | 14 | 49 | 60 | 70 |
|                                           | <b>1</b> | nose   | 1                  | 1                   | -  | 0  | 57 | 14 | 14 |
| 2                                         |          |        |                    | -                   | 29 | 57 | 0  | 50 | 17 |
| 3                                         |          |        |                    | -                   | 0  | 14 | 29 | 43 | 43 |
| milk                                      |          |        | 1                  | 14                  | -  | -  | -  | -  | 0  |
|                                           |          |        | 2                  | 29                  | -  | -  | -  | -  | 17 |
|                                           |          |        | 3                  | 29                  | -  | -  | -  | -  | 14 |
| <b>2</b>                                  |          | milk   | 1                  | 9                   | -  | -  | -  | -  | 22 |
|                                           |          |        | 2                  | 27                  | -  | -  | -  | -  | 40 |

<sup>a</sup> percent of cows in each vaccine group positive for staphylococcal species as determined by culture and PCR.

<sup>b</sup> Groups are defined as: Trial 1: 1=vaccinated 2X, 2=vaccinated 3X, 3=mock; and Trial 2: 1= vaccinated 2X, 2=mock.

# Supplementary Figure 1

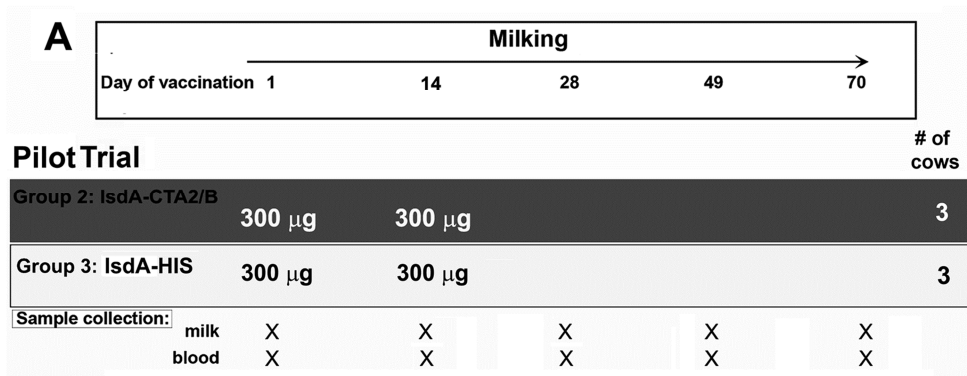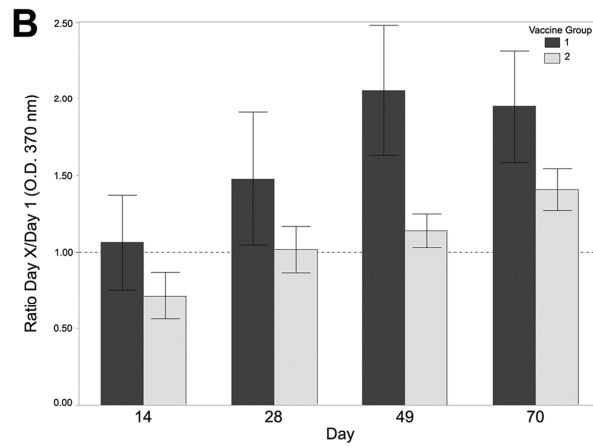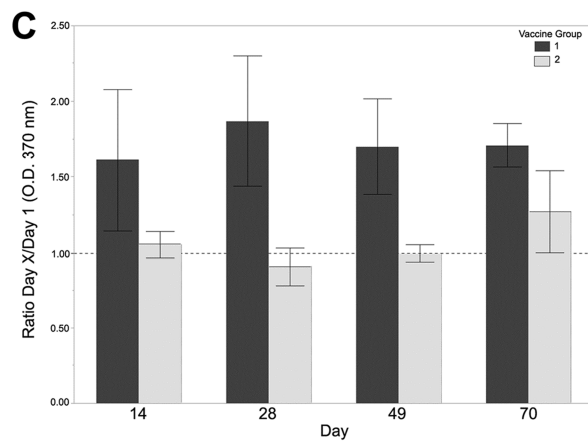

Supplement: NIHMS966346-supplement.pdf [file NIHMS966346-supplement.pdf]
